# Supplementary material for: A multi-chromic supercapacitor of high coloration efficiency integrating a MOF-derived V2O5electrode
Source: Royal Society of Chemistry journal article supplement (doi:10.1039/d2nr04841h), 2022-01-01
Supplement: d2nr04841h1.pdf [file d2nr04841h1.pdf]

## Supporting Information

### Contents

1. *Figure S1* – TGA and DSC plot for V-MOF
2. *Figure S2* – SEM, TEM, HRTEM images and EDX mapping data for  $V_2O_5$ -2 sample
3. *Figure S3* – Raman spectra of  $V_2O_5$  samples
4. *Figure S4* – XPS data including survey spectra and deconvoluted spectra of  $V_2O_5$ -2 sample
5. *Figure S5* –  $N_2$  gas adsorption isotherms, BET fittings and pore size distribution plots for  $V_2O_5$ -1 and  $V_2O_5$ -2 samples
6. *Figure S6* – Photographs of  $V_2O_5$ -1 electrode at different potentials; transmission and optical modulation spectra of  $V_2O_5$ -2 electrode in three-electrode set-up
7. *Figure S7* – Switching times and coloration efficiencies for both samples at 1000 nm
8. *Figure S8* – EIS data for both samples and equivalent circuit diagram used for data fitting
9. *Table S9* – Fitted resistance values for the samples obtained from EIS data fitting
10. *Figure S9* – Scan rate dependent CV data and  $\log(i)$  vs  $\log(v)$  plot of  $V_2O_5$ -2 electrode
11. *Figure S10* – Decoupling the current contributions in  $V_2O_5$ -1 electrode
12. *Figure S11* – FESEM images and ATR-FTIR data of PANI film
13. *Figure S12* – CV of PANI electrode at 20 mVps scan rate in three-electrode set-up
14. *Figure S13* – Transmission spectra and digital photographs of PANI films at different voltages along with optical modulation spectra; transmission modulation at a particular wavelength with change in current density
15. *Figure S14* – Scan rate dependent CV data for PANI electrode and deconvoluted current contributions with scan rate
16. *Figure S15* – GCD profiles of PANI electrodes; comparison of areal capacitances from CV and GCD data; in-situ change in transmittance with GCD curves

17. *Figure S16* –  $\log(i)$  vs  $\log(v)$  plot at different voltages for 2-electrode system and deconvoluted current contributions at different scan rates
18. *Figure S17* – Gradual change in transmission spectra of the multicolored device upon application of bias
19. *Figure S18* – Cycling performance of MECASC and GCD profiles with dynamic in-situ transmission modulations before and after cycling
20. *Figure S19* – Morphology of  $V_2O_5$  electrode before and after cycling
21. *Figure S20* – Morphology of PANI electrode before and after cycling

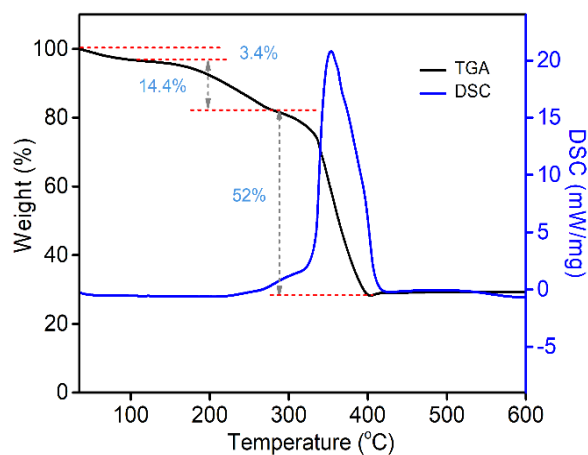

Figure S1: TGA and DSC data for V-MOF

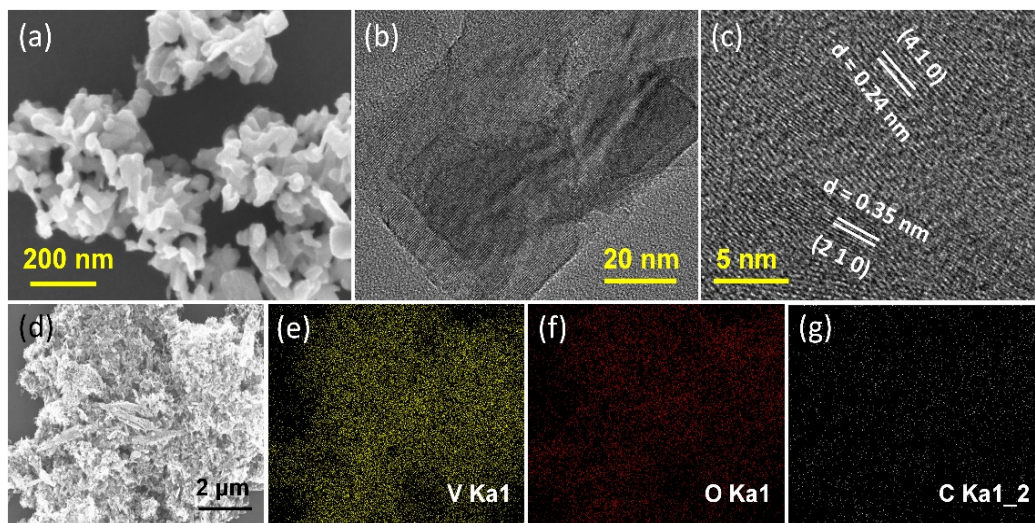

Figure S2: SEM, TEM and EDX mapping data for  $V_2O_5$ -2 sample

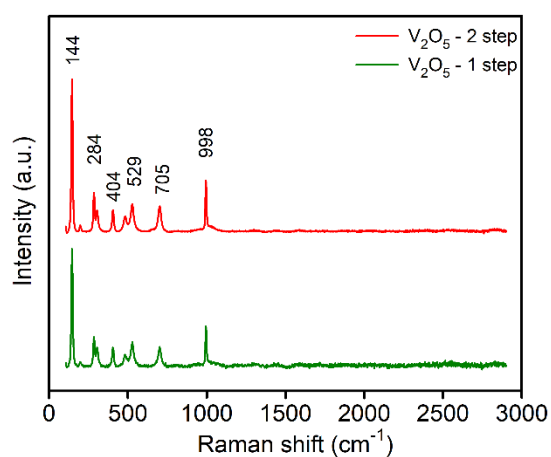

Figure S3: Raman data for both  $V_2O_5$  samples

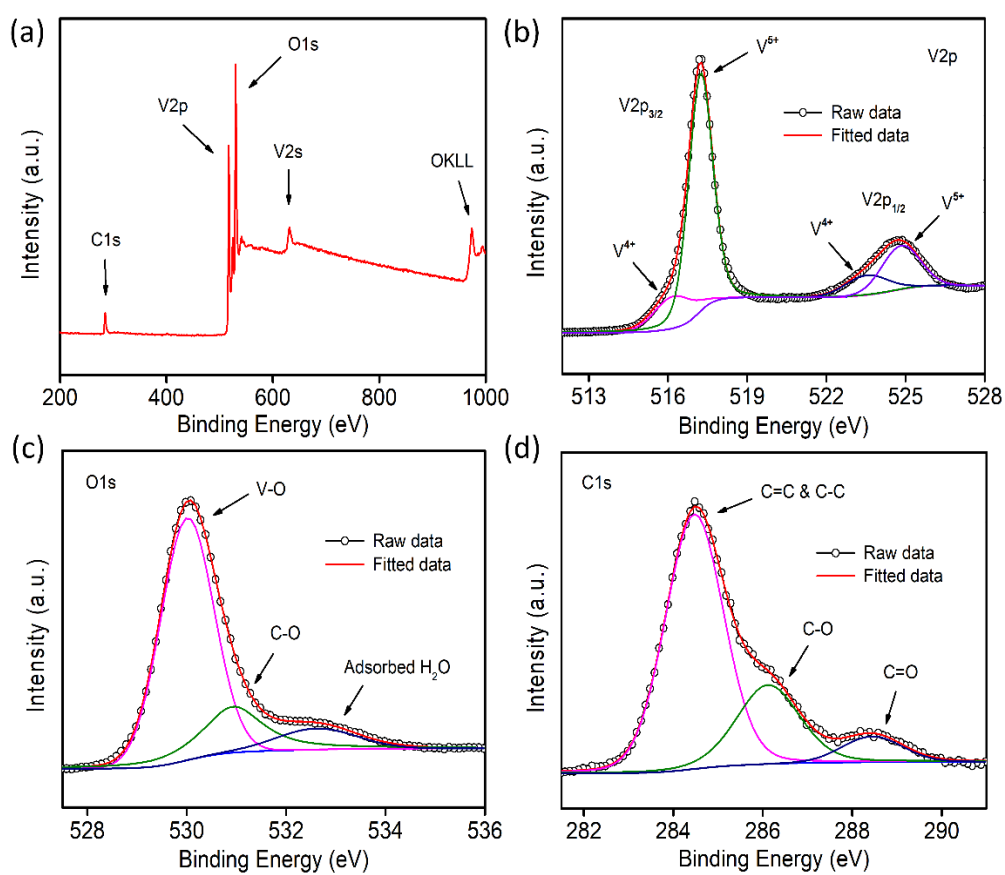

Figure S4: XPS data including survey spectra and the deconvoluted spectra of  $V_2O_5$ -2 sample

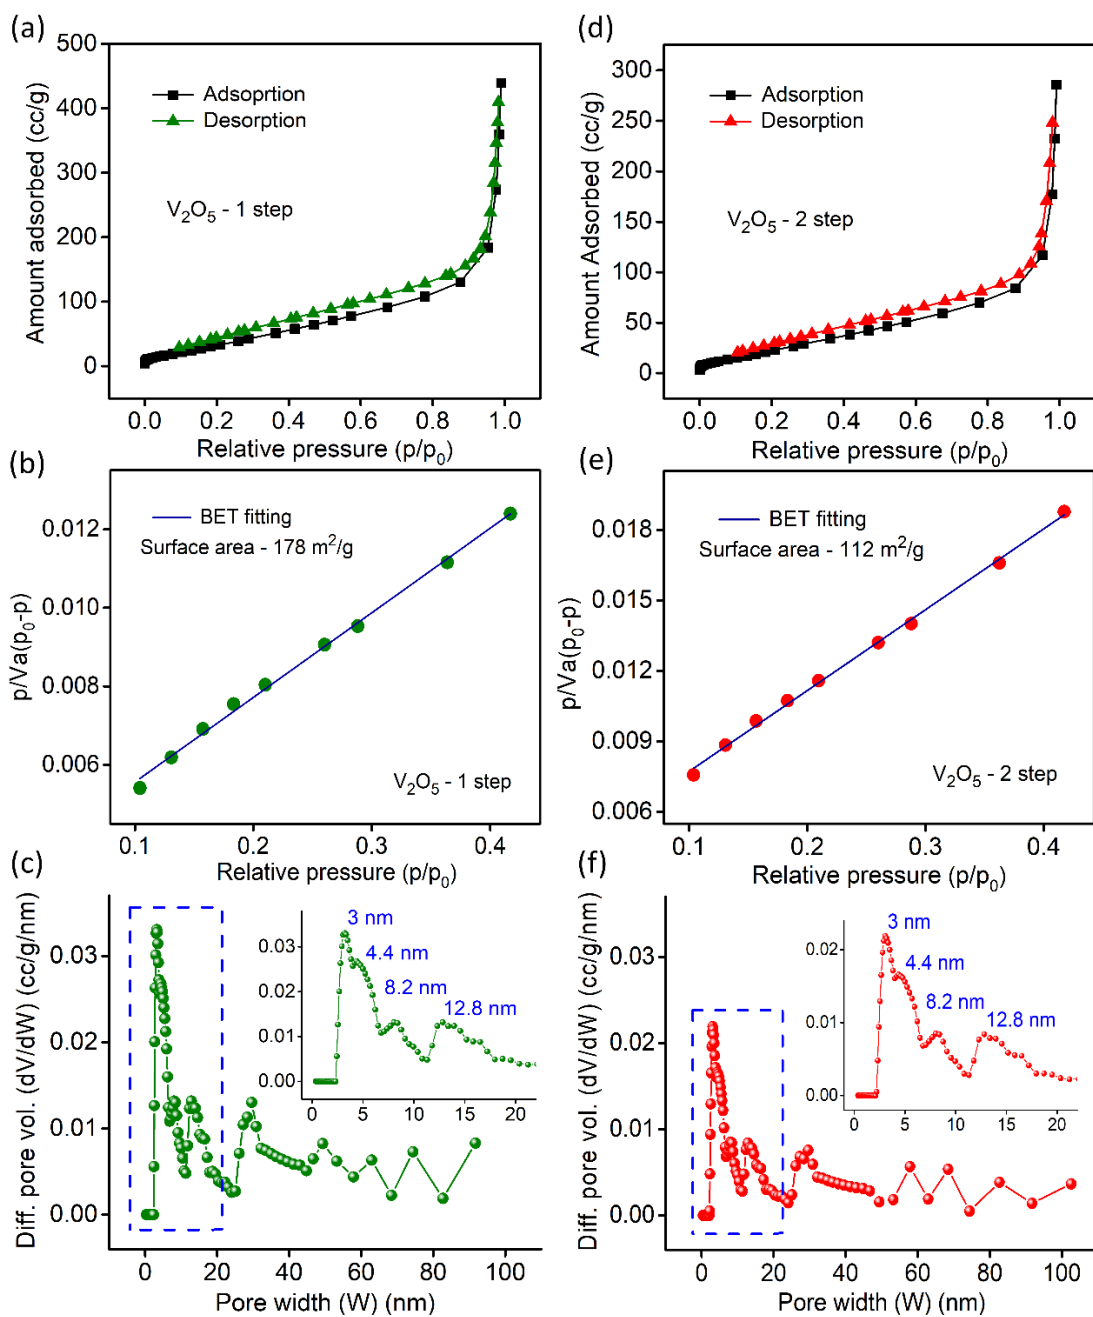

Figure S5: N<sub>2</sub> gas adsorption isotherm at 77 K, BET fitting data and NLDFT pore size distribution data for (a)-(c) V<sub>2</sub>O<sub>5</sub>-2 and (d)-(f) V<sub>2</sub>O<sub>5</sub>-1 samples

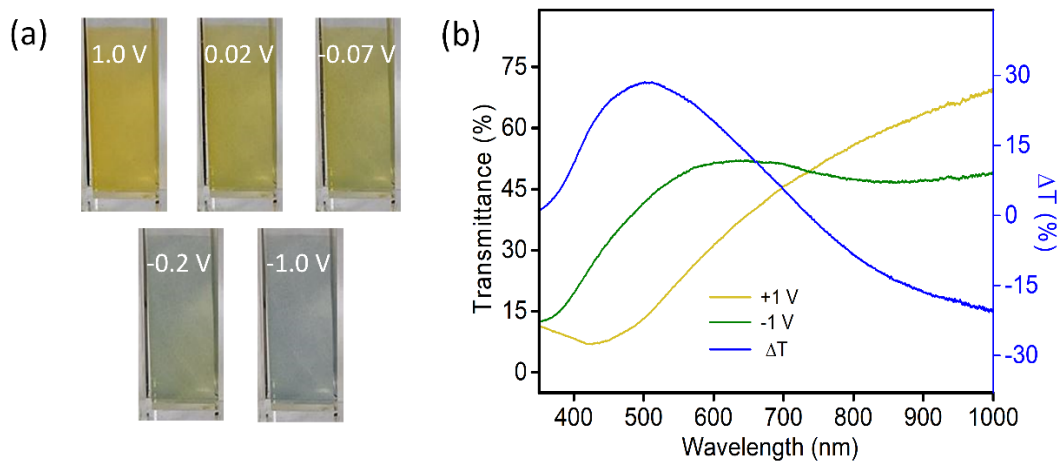

Figure S6: (a) Photographs of V<sub>2</sub>O<sub>5</sub>-1 electrode at different potentials, (b) Transmission and optical modulation spectra of V<sub>2</sub>O<sub>5</sub>-2 electrode in 3-electrode set-up

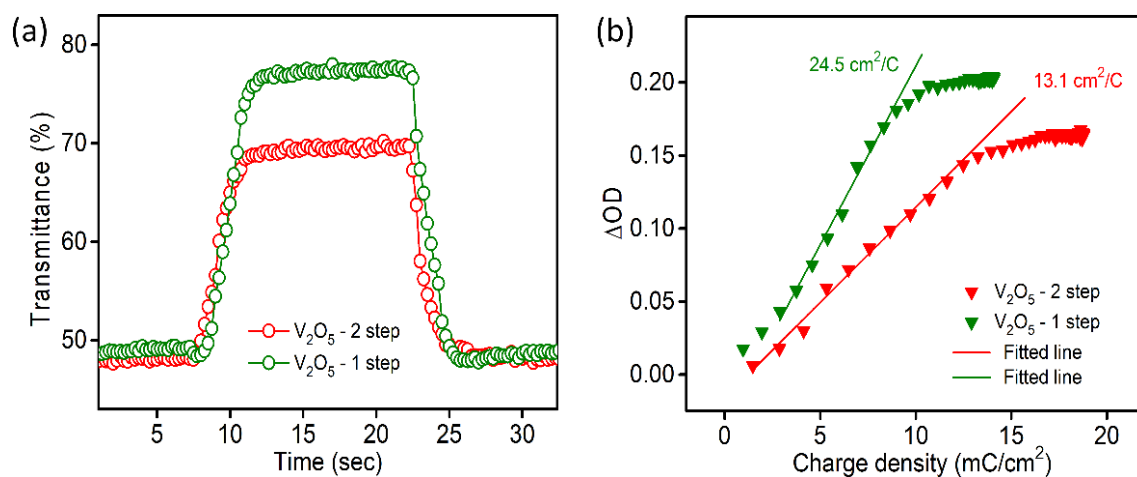

Figure S7: (a) Switching times and (b) coloration efficiencies at 1000 nm for both samples

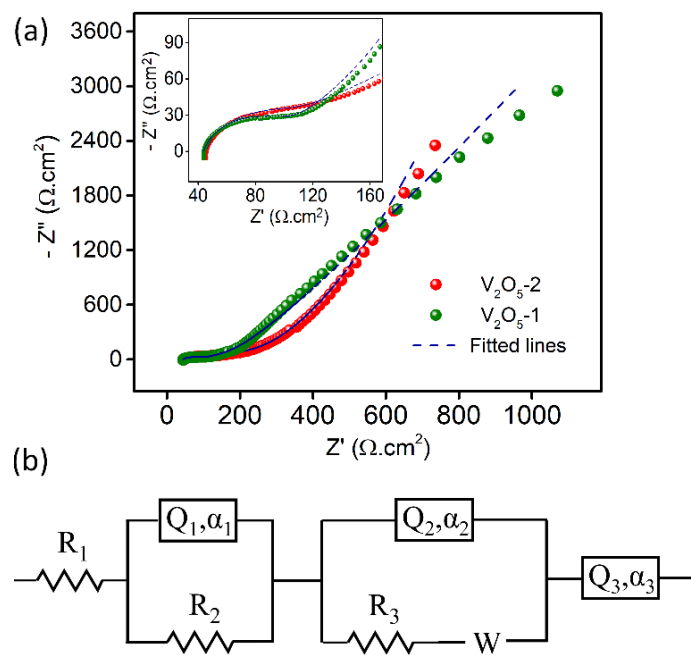

Figure S8: (a) Nyquist plots of the samples, (b) equivalent circuit diagram

Table S1: Comparison of resistance values obtained from modelling the Nyquist plots

| Films                     | $R_1$ ( $\Omega\text{cm}^2$ ) | $R_2$ ( $\Omega\text{cm}^2$ ) | $R_3$ ( $\Omega\text{cm}^2$ ) | Measurement error (%) |
|---------------------------|-------------------------------|-------------------------------|-------------------------------|-----------------------|
| $\text{V}_2\text{O}_5$ -1 | 43.87                         | 50.2                          | 58.1                          | < 3.31                |
| $\text{V}_2\text{O}_5$ -2 | 45.31                         | 97.1                          | 60.3                          | < 2.95                |

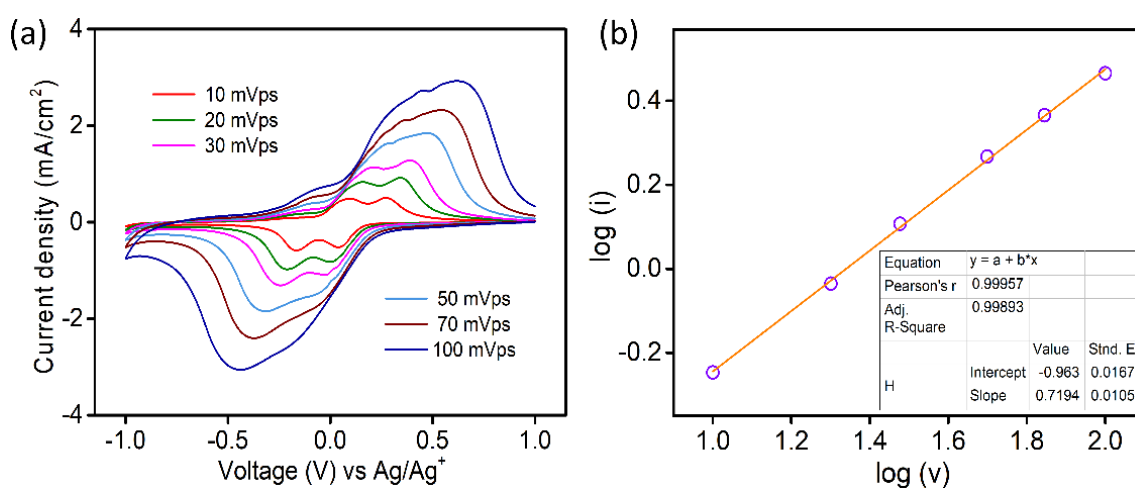

Figure S9: (a) Scan rate dependent CV data and (b)  $\log(i)$  vs  $\log(v)$  plots for  $\text{V}_2\text{O}_5$ -2 electrode

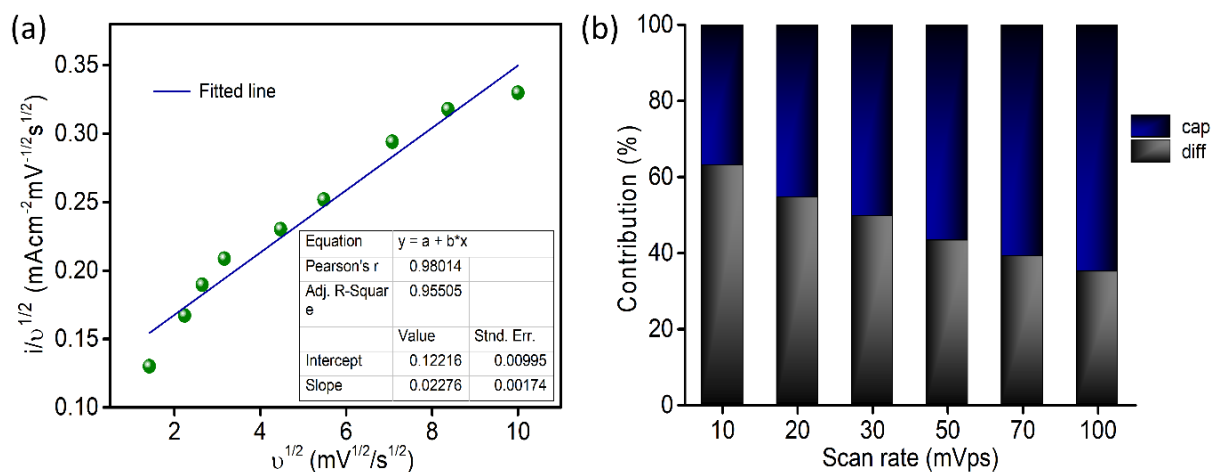

Figure S10: (a)  $i/v^{1/2}$  vs  $v^{1/2}$  plot for  $V_2O_5$ -1 electrode and (d) histogram plot shows the decoupling of current contributions with scan rate

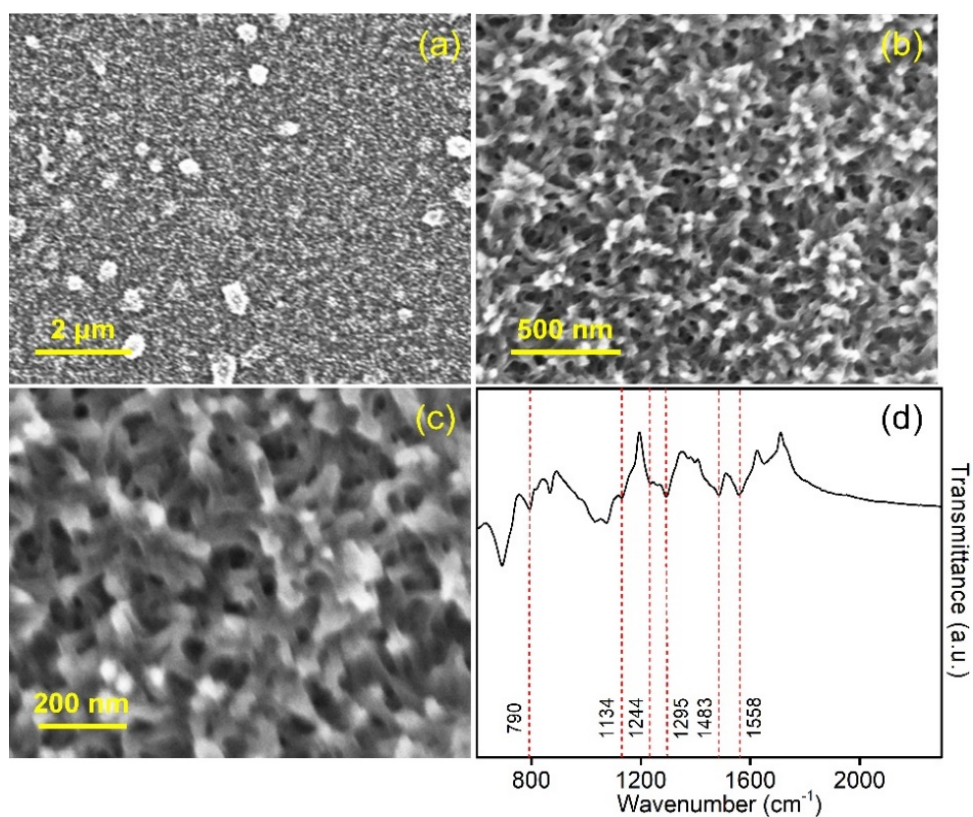

Figure S11: (a)-(c) FESEM images and (d) ATR-FTIR data of as-deposited PANI film



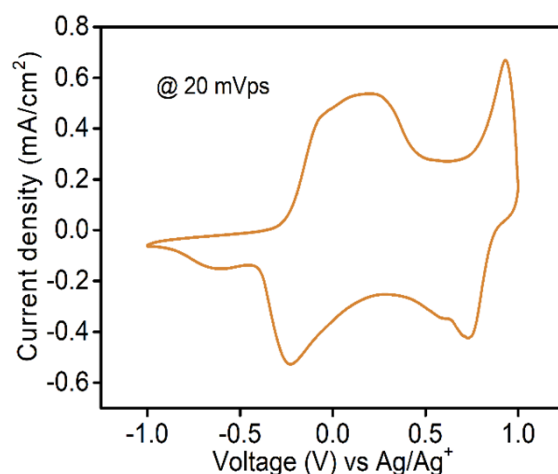

Figure S12: CV of PANI film in three-electrode set-up at 20 mVps scan rate in 1 M LiClO<sub>4</sub>/PC electrolyte

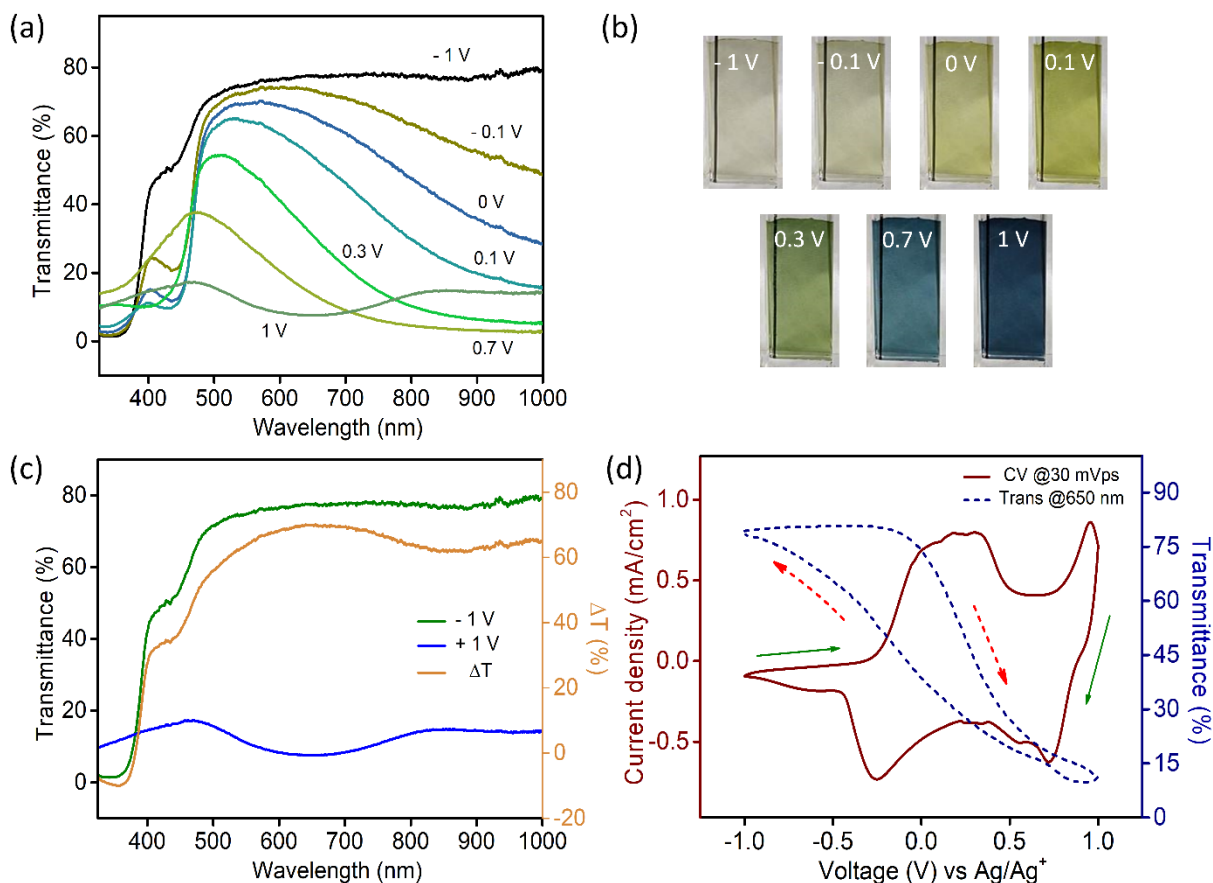

Figure S13: (a) Transmission spectra and (b) digital photographs of PANI electrodes at different applied biases, (c) Transmission data at +1 V and -1 V along with the optical modulation spectra (orange curve); (d) CV data of PANI film (wine curve) at 50 mV/s scan rate as well as the in-situ change in transmission at 650 nm (blue dotted line).



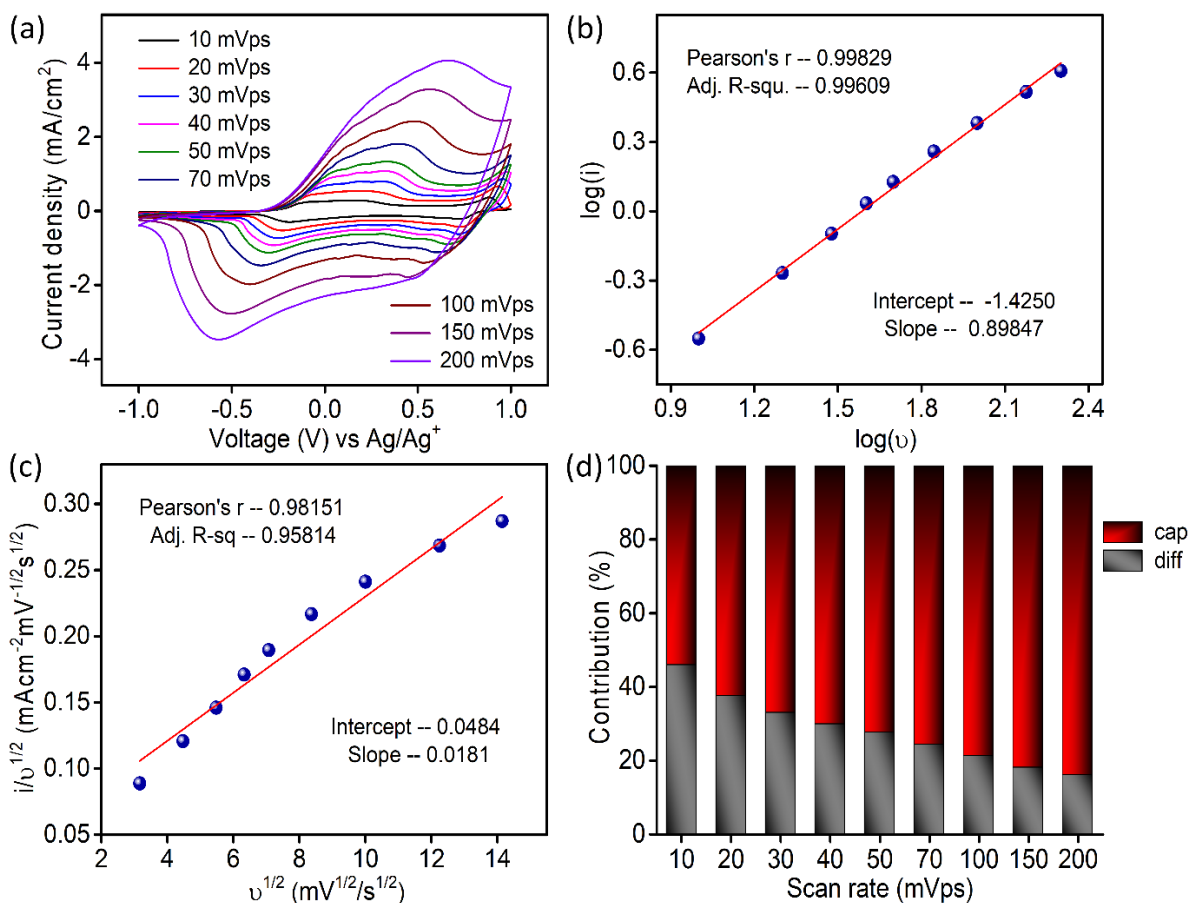

Figure S14: (a) Scan rate dependent CV data for PANI electrode, (b)  $\log(i)$  vs  $\log(v)$  plot, (c)  $i/v^{1/2}$  vs  $v^{1/2}$  plot and (d) deconvoluting current contributions with scan rate

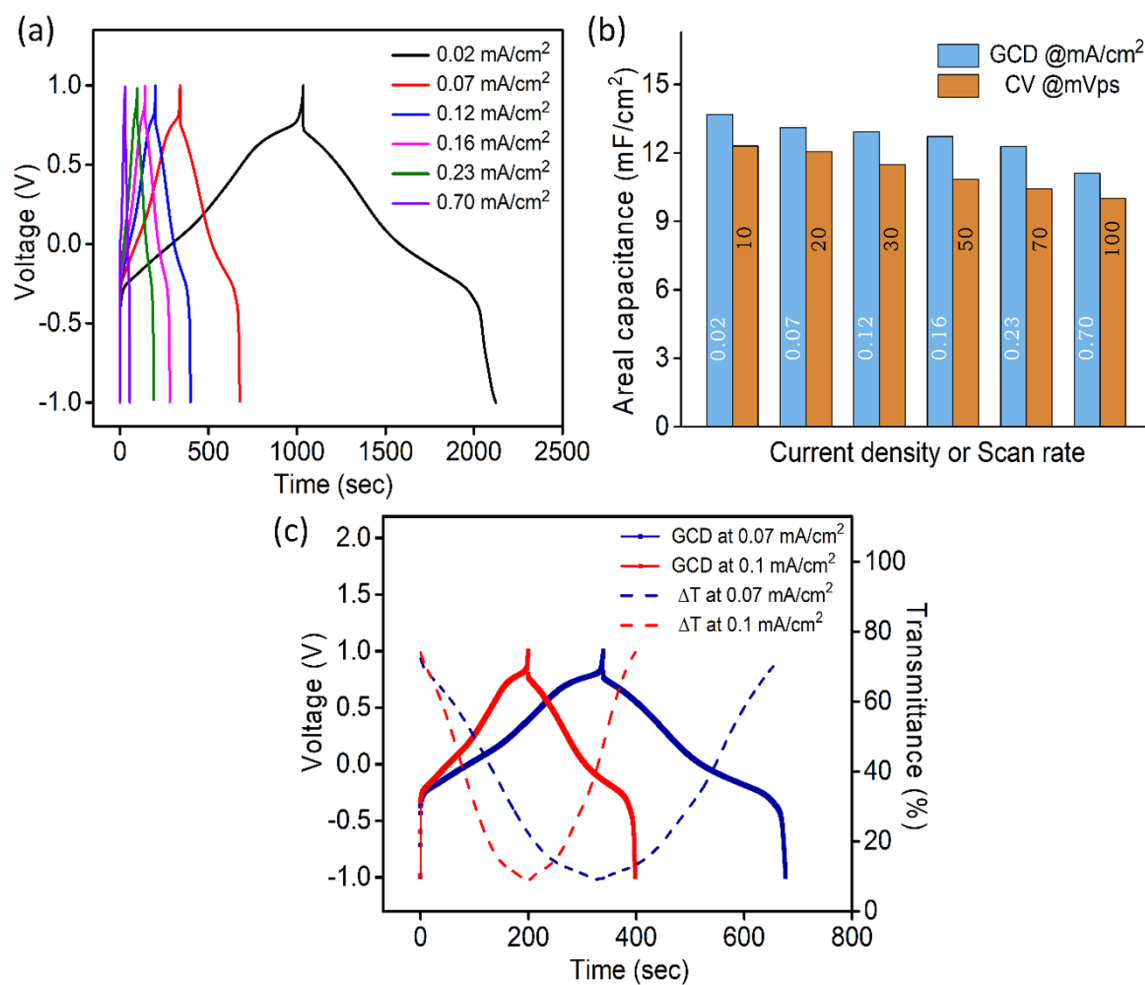

Figure S15: (a) GCD curves at different current densities; (b) comparison of areal specific capacitance values obtained from CV and GCD data; (c) in-situ change in transmittance at 650 nm synced with GCD curves at different current densities.

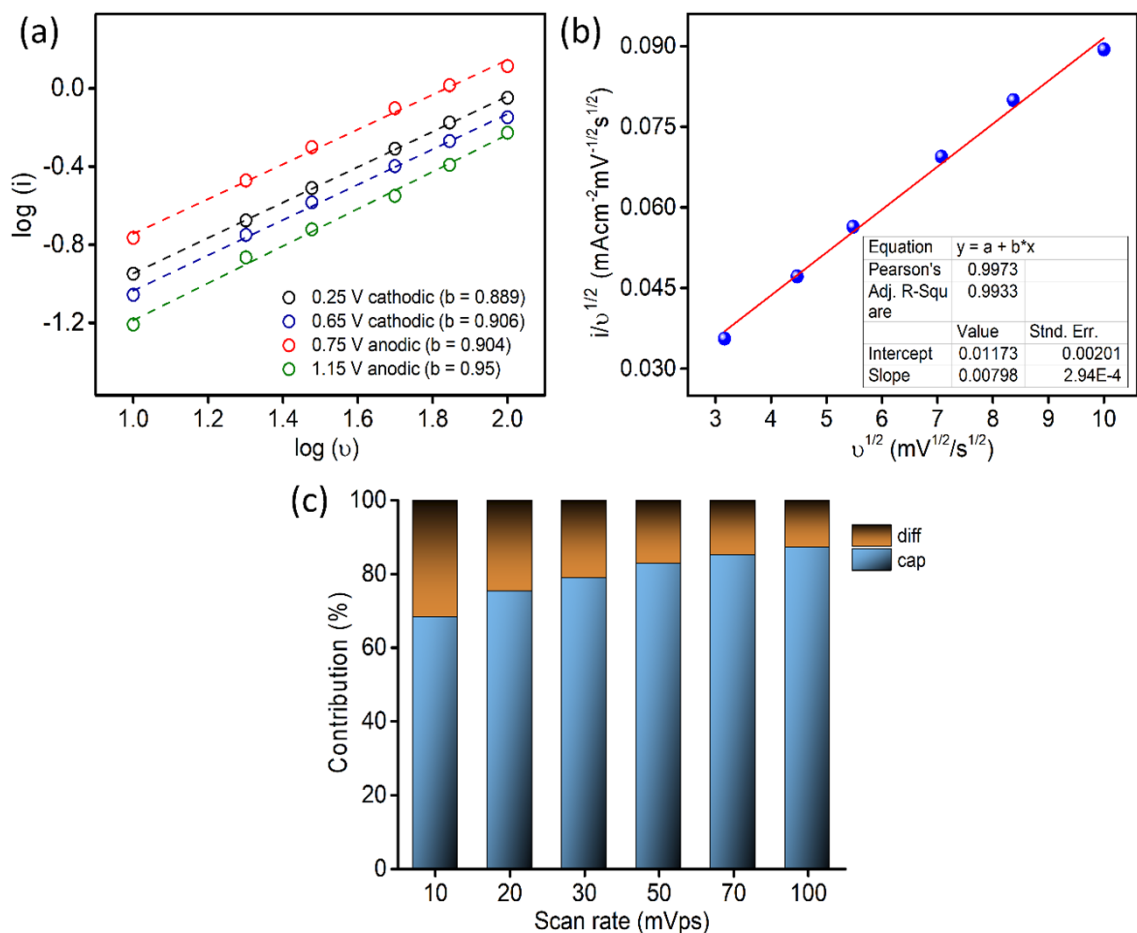

Figure S16: (a)  $\log(i)$  vs  $\log(v)$  plot for ASC system at different voltages, (b)  $i/v^{1/2}$  vs  $v^{1/2}$  graph, (c) separating the current contributions at different scan rates

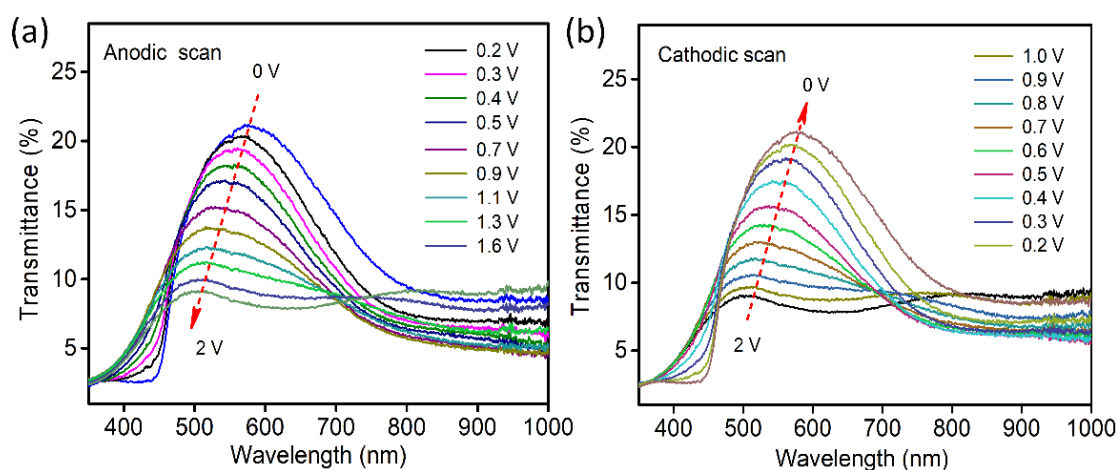

Figure S17: Gradual change in transmission spectra of MECASC during (a) anodic and (b) cathodic scan

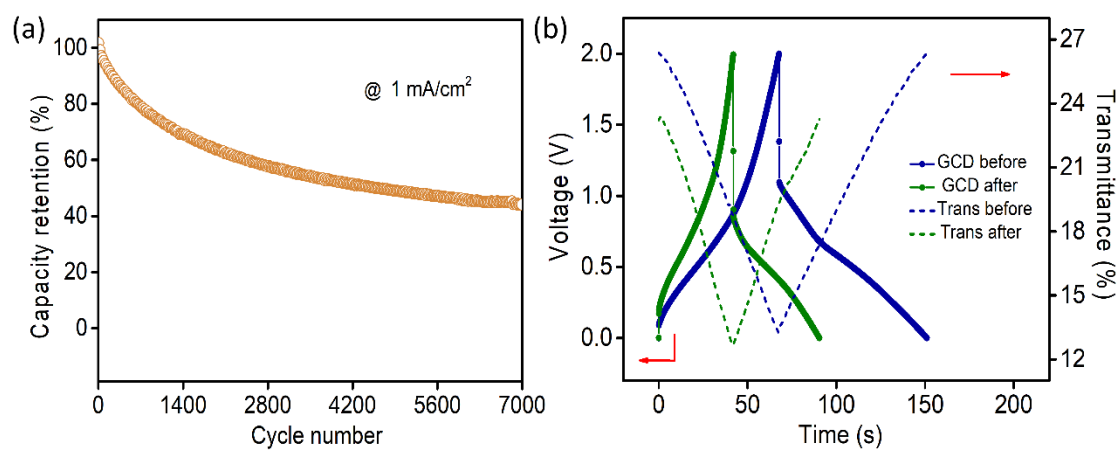

Figure S18: (a) Cycling performance of MECASC up to 7000 cycles; (b) GCD profiles of the system at  $0.12 \text{ mA/cm}^2$  and dynamic in-situ transmission modulations at 580 nm before and after cycling

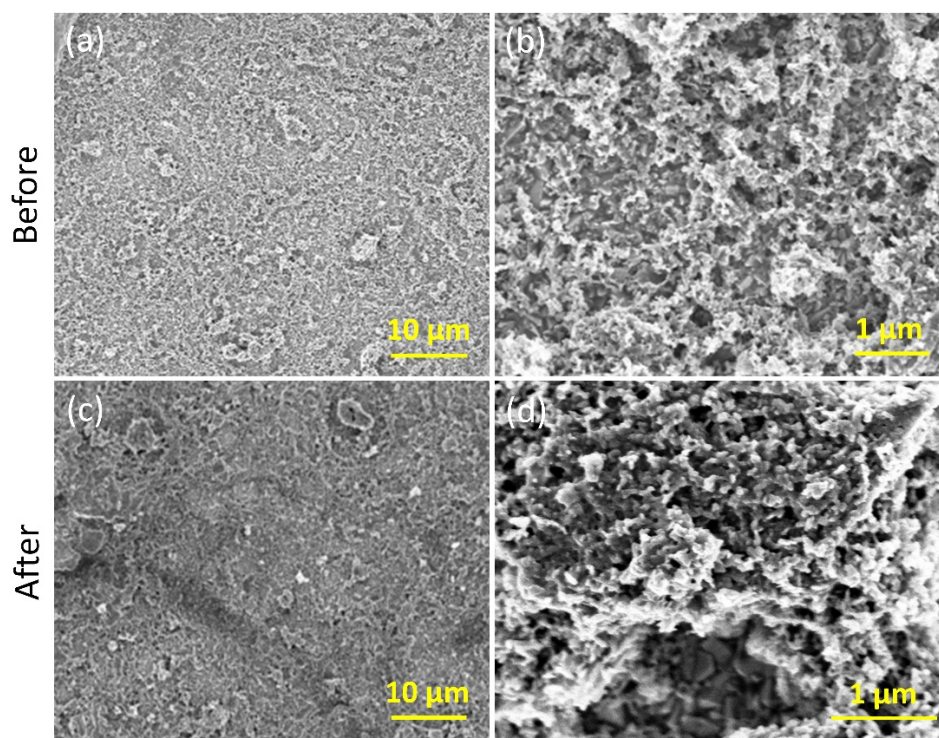

Figure S19: Morphology of  $\text{V}_2\text{O}_5$  films before (a)-(b) and after (c)-(d) cycling in 2-electrode system at different magnifications

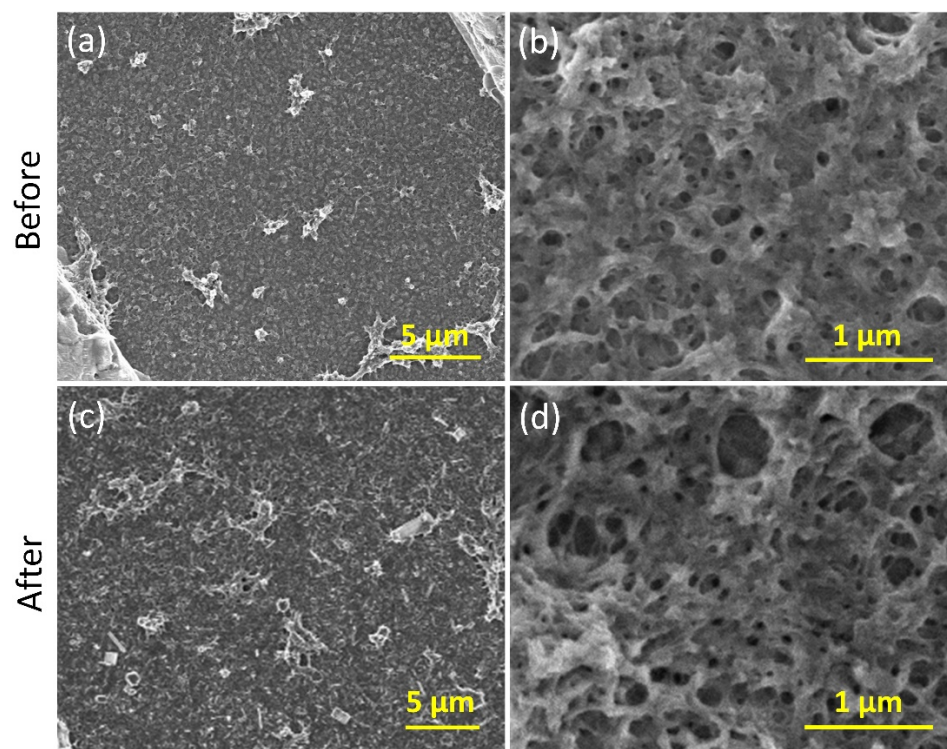

Figure S20: Morphology of PANI films before (a)-(b) and after (c)-(d) cycling in 2-electrode system at different magnifications
